# Supplementary material for: Effect of capping methods on the morphology of silver nanoparticles: study on the media-induced release of silver from the nanocomposite β-cyclodextrin/alginate
Source: Royal Society of Chemistry journal article supplement (doi:10.1039/c9nj04730a), 2019-01-01
Supplement: c9nj04730a1.pdf [file c9nj04730a1.pdf]

## **Effect of capping methods on morphology of silver nanoparticles: A study on medium-induced release of silver from nanocomposite $\beta$ -cyclodextrin/alginate**

Thanh-Danh Nguyen<sup>a,b\*</sup>, Thanh-Truc Vo<sup>b,c</sup>, T. Thanh-Tam Huynh<sup>b</sup>, Cao-Hien Nguyen<sup>c,d</sup>, Van-Dat Doan<sup>e</sup>, Dinh-Truong Nguyen<sup>f</sup>, Trinh-Duy Nguyen<sup>g</sup> and Chi-Hien Dang<sup>b,c</sup>

<sup>a</sup>Institute of Research and Development, Duy Tan University, Da Nang City, Viet Nam.

<sup>b</sup>Institute of Chemical Technology, Vietnam Academy of Science and Technology, 1 Mac Dinh Chi Street, District 1, Ho Chi Minh City, Viet Nam.

<sup>c</sup>Graduate University of Science and Technology, Vietnam Academy of Science and Technology, 18 Hoang Quoc Viet, Cau Giay, Hanoi, Viet Nam.

<sup>d</sup>Department of Chemical Technology, Ho Chi Minh City University of Food Industry, Ho Chi Minh, Viet Nam.

<sup>e</sup>Faculty of Chemical Engineering, Industrial University of Ho Chi Minh city, Ho Chi Minh city, Viet Nam.

<sup>f</sup>School of Biotechnology, Tan Tao University, Long An Province, Viet Nam.

‡Center of Excellence for Green Energy and Environmental Nanomaterials,  
Nguyen Tat Thanh University, Ho Chi Minh City 755414, Vietnam.

**\*Corresponding author:** Thanh-Danh Nguyen, Fax: (+84)-8.38238265;

Email: danh5463bd@yahoo.com

## **Supplementary Data**

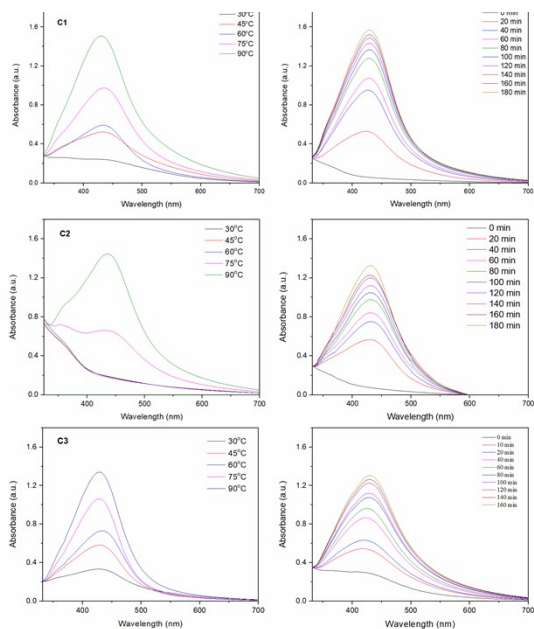

**Figure S1.** UV-Vis Spectra of samples for optimization of reaction temperature (left) and time (right).

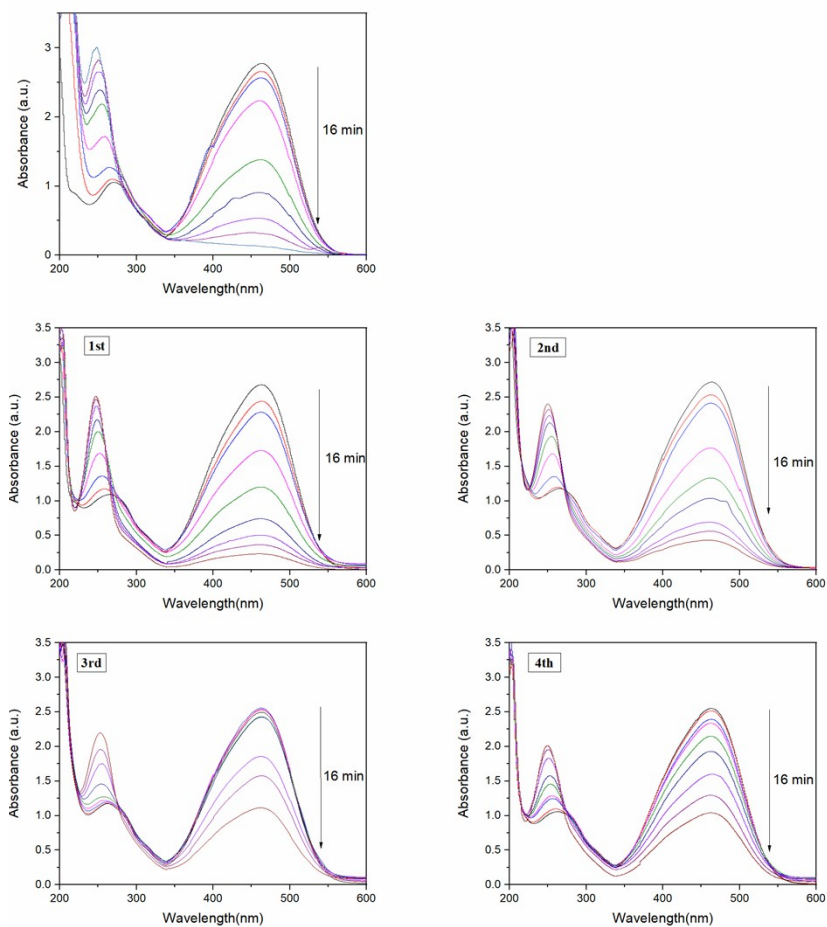

**Figure S2.** UV-Vis spectra for cyclable degradation of MO using the catalyst **C1**

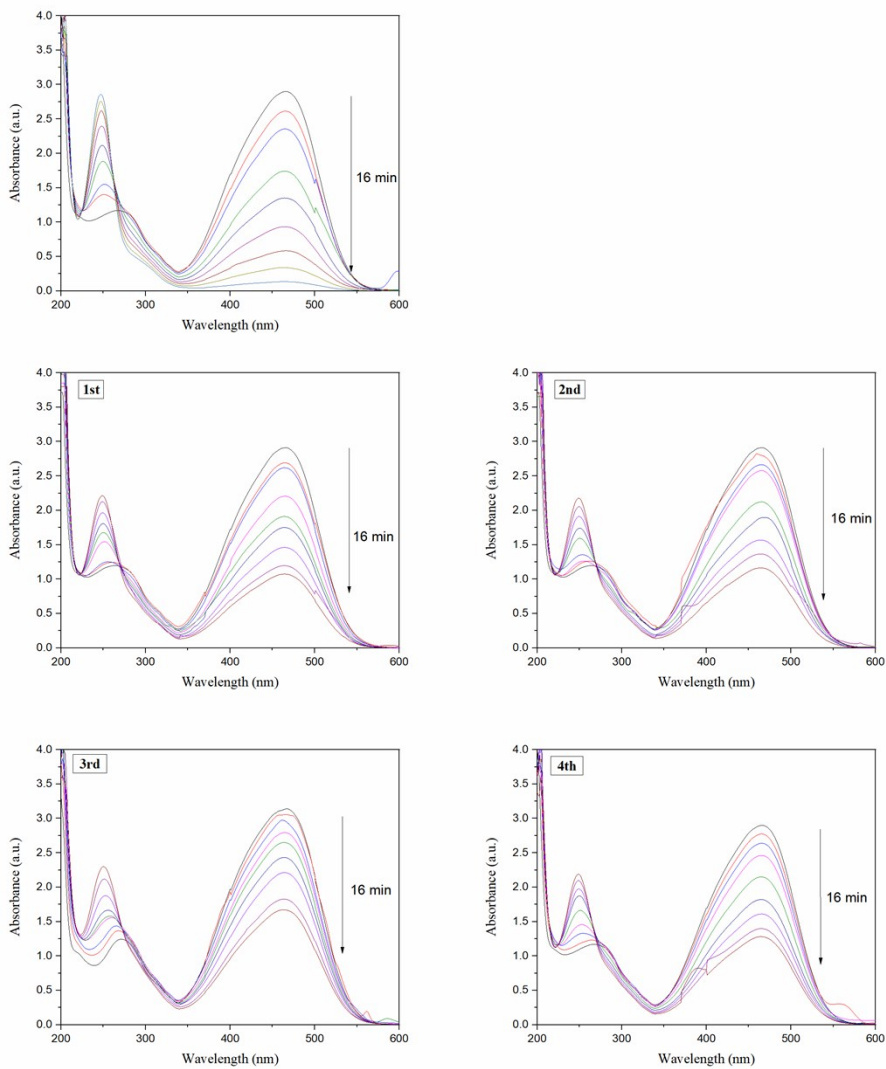

**Figure S3.** UV-Vis spectra for cyclable degradation of MO using the catalyst **C2**

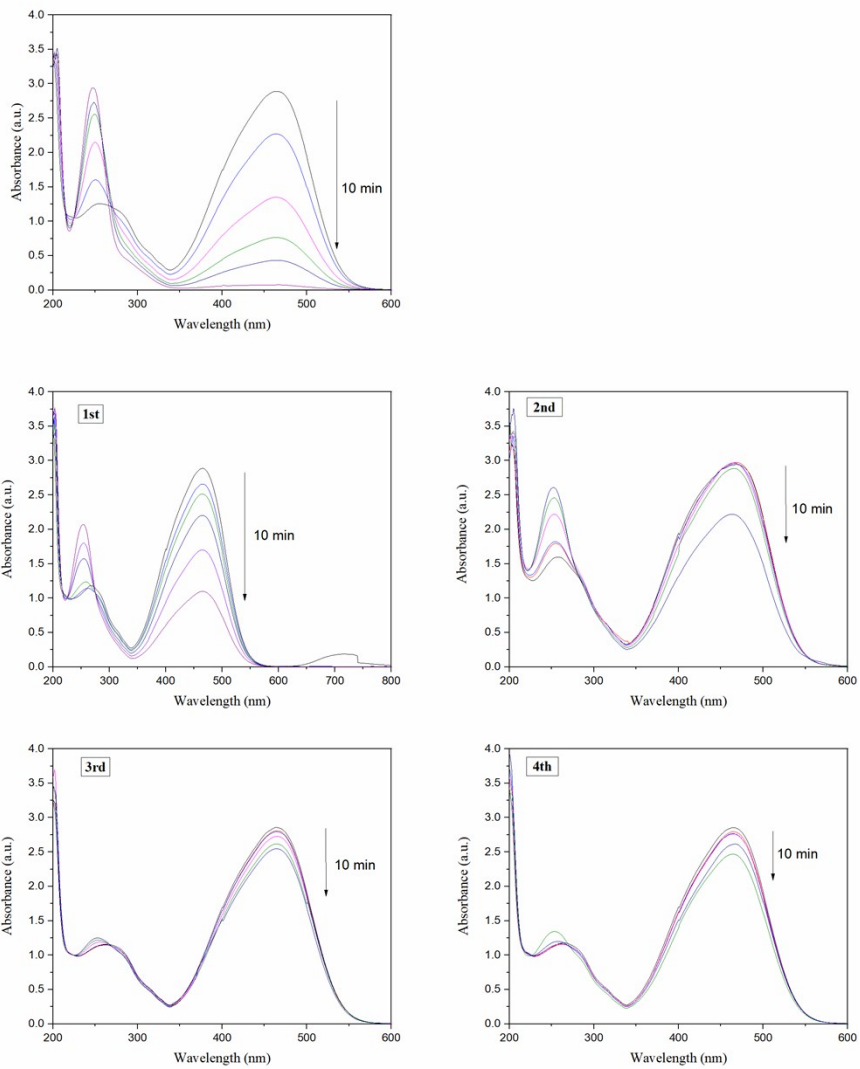

**Figure S4.** UV-Vis spectra for cyclable degradation of MO using the catalyst **C3**

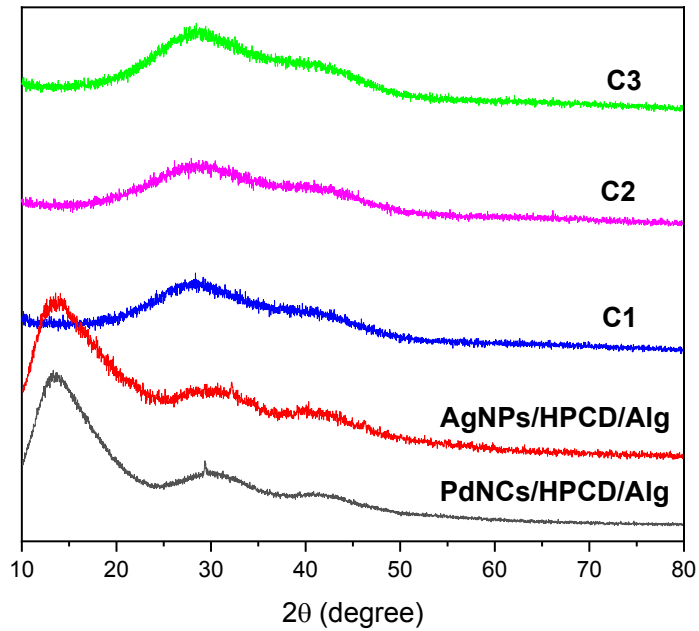

**Figure S5.** XRD spectra of all samples. There are no characteristic peaks of crystalline metallic nanomaterials.

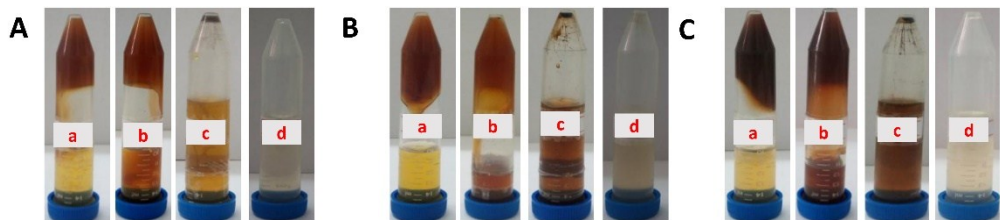

**Figure S6.** Photography of samples C1 (A), C2 (B) and C3 (C) at different pHs: pH4 (a), pH7 (b), pH10a (c) and pH10b (d).

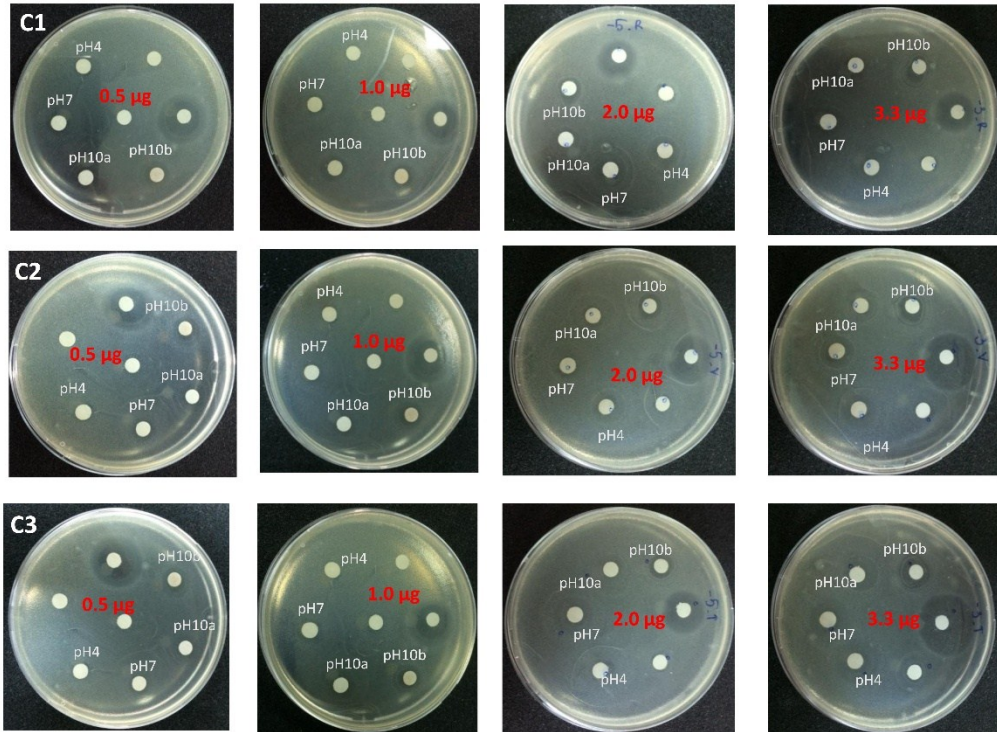

Figure S7. Photography for test of antibacterial activity against *E. coli*
